# Supplementary material
Source: PubMed Central journal article supplement (PMC6019171)
Supplement: NIHMS954132-supplement-Supplement_Table_1.pdf [file NIHMS954132-supplement-Supplement_Table_1.pdf]

**Supplemental Table 1: Alternate Multivariable Models Relating Sex to Presence of Plaque and Presence of Positively Remodeled Plaque Among HIV-Infected Women and Men (n = 142)**

|                           | Presence of Any Plaque |                 | Presence of Positively Remodeled Plaque |                 |
|---------------------------|------------------------|-----------------|-----------------------------------------|-----------------|
|                           | Odds Ratio [95% CI]    | <i>P</i> -value | Odds Ratio [95% CI]                     | <i>P</i> -value |
| Age, years                | 6.4 [3.0, 15.3]        | < 0.0001        | 3.4 [1.7, 7.2]                          | 0.0007          |
| Male sex                  | 3.8 [1.4, 11.4]        | 0.01            | 3.5 [1.3, 10.1]                         | 0.02            |
| White race                | 5.0 [0.8, 47.3]        | 0.12            | 3.1 [0.5, 26.6]                         | 0.25            |
| Black race                | 5.1 [0.8, 46.7]        | 0.11            | 2.4 [0.4, 20.3]                         | 0.36            |
| Hispanic                  | 0.7 [0.1, 8.7]         | 0.78            | 0.5 [0, 6.0]                            | 0.57            |
| Current hypertension      | 1.7 [0.6, 5.0]         | 0.36            | 1.4 [0.6, 3.8]                          | 0.46            |
| Current diabetes mellitus | 0.8 [0.2, 2.8]         | 0.66            | 0.7 [0.2, 2.4]                          | 0.61            |
| HDL-C, mg/dL              | 0.9 [0.7, 1.1]         | 0.27            | 1.0 [0.8, 1.3]                          | 0.93            |
| VAT, cm <sup>2</sup>      | 1.0 [0.9, 1.0]         | 0.31            | 1.0 [0.9, 1.0]                          | 0.17            |
| NNRTI-based regimen       | 1.1 [0.3, 3.9]         | 0.93            | 1.4 [0.4, 4.8]                          | 0.63            |
| PI-based regimen          | 0.6 [0.2, 1.7]         | 0.33            | 1.0 [0.4, 3.0]                          | 0.97            |

Odds ratios for continuous variables are reported per a 10-unit change in the variable of interest. Odds ratios for categorical variables compare odds of presence versus absence of parameter except for ART in which the reference group is a regimen that is neither NNRTI- nor PI-based. Odds ratios and *P*-values were determined by multivariable logistic regression.

HDL-C, high-density lipoprotein cholesterol; NNRTIs, non-nucleoside reverse transcriptase inhibitors; NRTIs, nucleoside reverse transcriptase inhibitors; PIs, protease inhibitors VAT, visceral adipose tissue.
